# Supplementary material for: Single-pot enzymatic synthesis of Dicer-substrate siRNAs
Source: PubMed Central journal article supplement — Nucleic Acids Res. 2011 Dec 20;40(5):e40. doi: 10.1093/nar/gkr1174 (PMC3299999; doi:10.1093/nar/gkr1174), 2011-12-20
Supplement: supp_gkr1174_nar-02300-met-g-2011-File006.pdf [file supp_gkr1174_nar-02300-met-g-2011-File006.pdf]

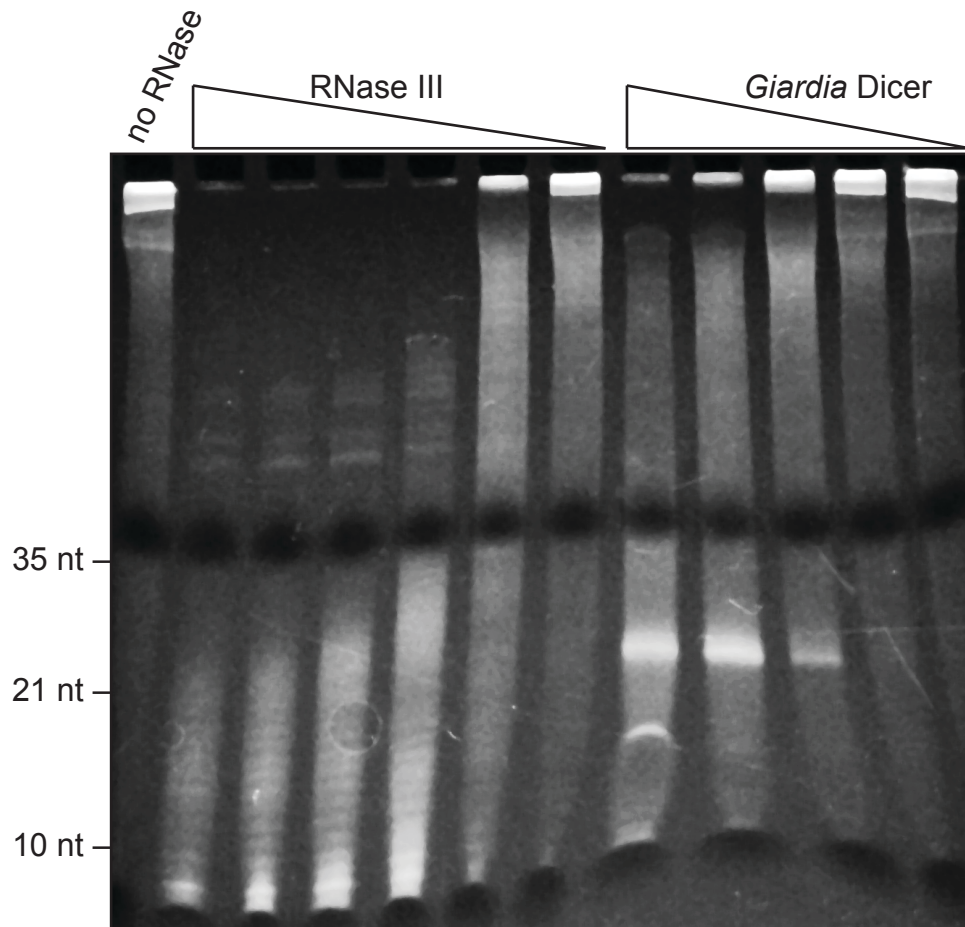

**Figure S1. Co-transcriptional dsRNA cleavage with *E.coli* RNase III and *Giardia Dicer*.** Decreasing amounts of nuclease were used in individual transcription reactions (each reaction contained 1/4 the amount of nuclease in the previous). The maximum amount of RNase III used was 5  $\mu$ l of “Short Cut” RNase III from New England Biolabs in a 40  $\mu$ l reaction volume. The maximum concentration of *Giardia Dicer* used was 50 ng/ $\mu$ l. We could identify no amount of RNase III that generated a clean sample of ~ 22 nt RNAs.

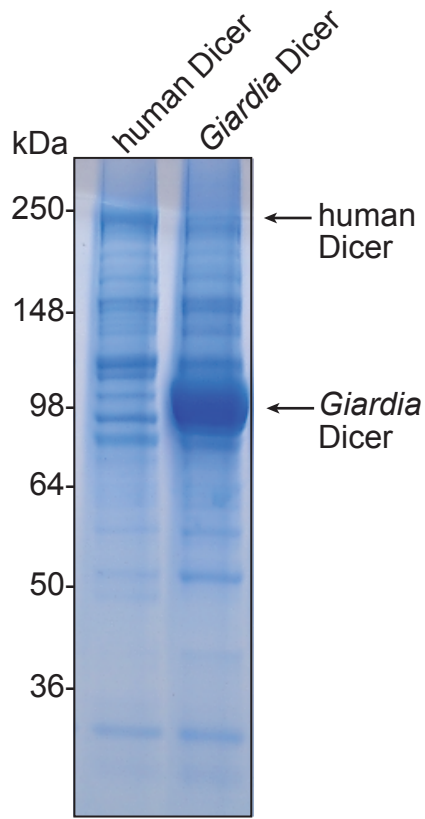

**Figure S2. Expression levels of recombinant human and *Giardia* Dicer.** Sf9 cells were infected with baculovirus bearing genes for His<sub>6</sub>-tagged human Dicer or *Giardia* Dicer. Cells lysates were subjected to a crude Ni-NTA purification step and analyzed on SDS PAGE. The expression level of *Giardia* Dicer was more than 10-fold higher than human Dicer.

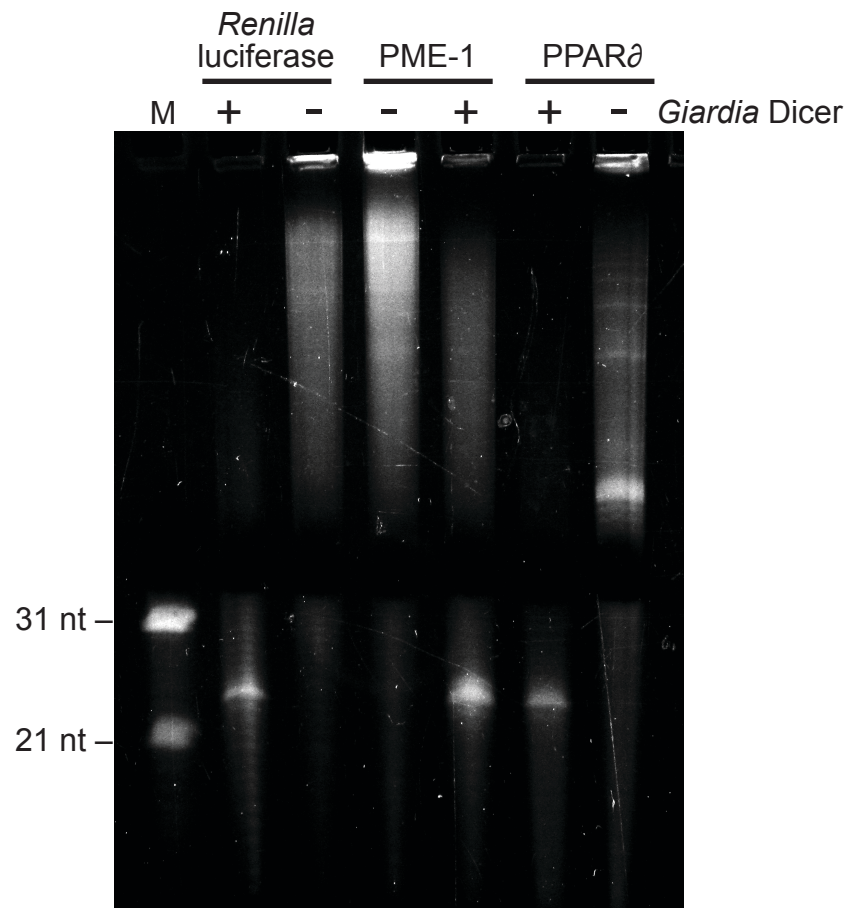

Figure S3. Generation of small RNA pools against three different targets. Transcription reactions, plus and minus *Giardia* Dicer, from three different DNA templates were resolved on a 14% denaturing gel. Transcription templates were generated by PCR amplifying 500 bp segments of *Renilla* luciferase, phosphatase methylesterase-1 (PME-1) or peroxisome proliferator-activated receptor delta (PPR $\delta$ ) cDNAs.
